# Supplementary material
Source: MDPI journal article supplement (https://www.mdpi.com/2227-9040/10/4/129)
Supplement: s1 [file s1]

# Spectroscopic Study of Phytosynthesized Ag Nanoparticles and Their Activity as SERS Substrate

Volodymyr Dzhagan <sup>1,2,\*</sup>, Oleksandr Smirnov <sup>3,4</sup>, Mariia Kovalenko <sup>3</sup>, Nazar Mazur <sup>1</sup>, Oleksandr Hreshchuk <sup>1</sup>, Nataliya Taran <sup>3</sup>, Svitlana Plokhovska <sup>5</sup>, Yaroslav Pirko <sup>5</sup>, Alla Yemets <sup>5</sup>, Volodymyr Yukhymchuk <sup>1</sup> and Dietrich R.T. Zahn <sup>6,7</sup>

- <sup>1</sup> V. Lashkaryov Institute of Semiconductors Physics, National Academy of Sciences of Ukraine, 03028 Kyiv, Ukraine; nazarmazur1994@gmail.com (N.M.); hreshchuk@gmail.com (O.H.); yukhym@isp.kiev.ua (V.Y.)  
<sup>2</sup> Physics Department, Taras Shevchenko National University of Kyiv, 01601 Kyiv, Ukraine  
<sup>3</sup> ESC "Institute of Biology and Medicine", Taras Shevchenko National University of Kyiv, 01601 Kyiv, Ukraine; plantaphys@gmail.com (O.S.); mariia.s.kovalenko@gmail.com (M.K.); ny\_taran@ukr.net (N.T.)  
<sup>4</sup> Institute of Plant Physiology and Genetics, National Academy of Sciences of Ukraine, 03022 Kyiv, Ukraine  
<sup>5</sup> Institute of Food Biotechnology and Genomics, National Academy of Sciences of Ukraine, 04123 Kyiv, Ukraine; svetaplohovska@gmail.com (S.P.); yarvp1@gmail.com (Y.P.); yemets.alla@gmail.com (A.Y.)  
<sup>6</sup> Semiconductor Physics, Chemnitz University of Technology, 09107 Chemnitz, Germany; zahn@physik.tu-chemnitz.de  
<sup>7</sup> Center for Materials, Architectures and Integration of Nanomembranes (MAIN), Chemnitz University of Technology, 09107 Chemnitz, Germany  
\* Correspondence: dzhagan@isp.kiev.ua

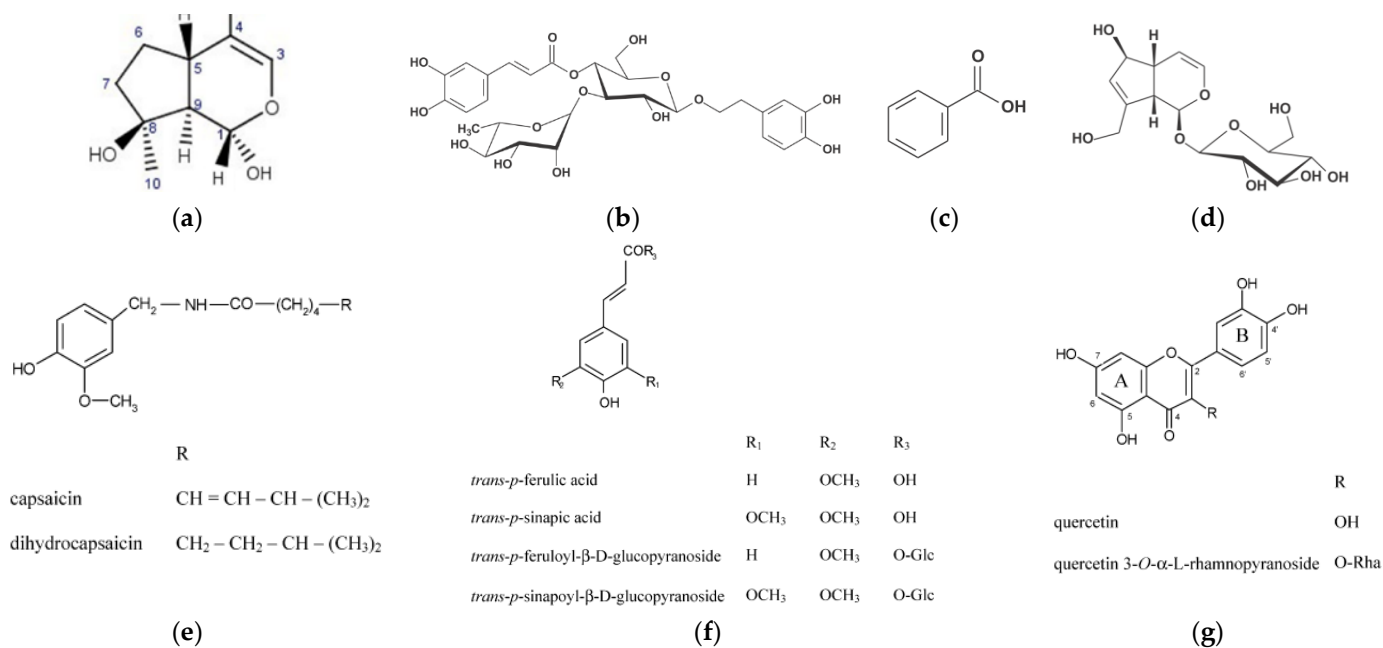

**Figure S1.** Schematic of the molecules reported in *L. squamaria*: (a) iridoid aglycones [24]; (b) acteoside [25]; (c) benzoic acid [25]; (d) aucubin [21,25]; and *Capsicum chinense*: (e–g) [22].

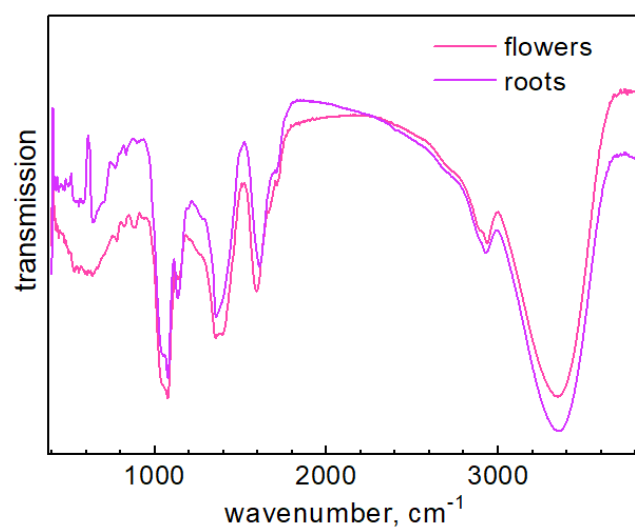

**Figure S2.** Spectra of IR absorption of common toothwort roots and flowers extracts.

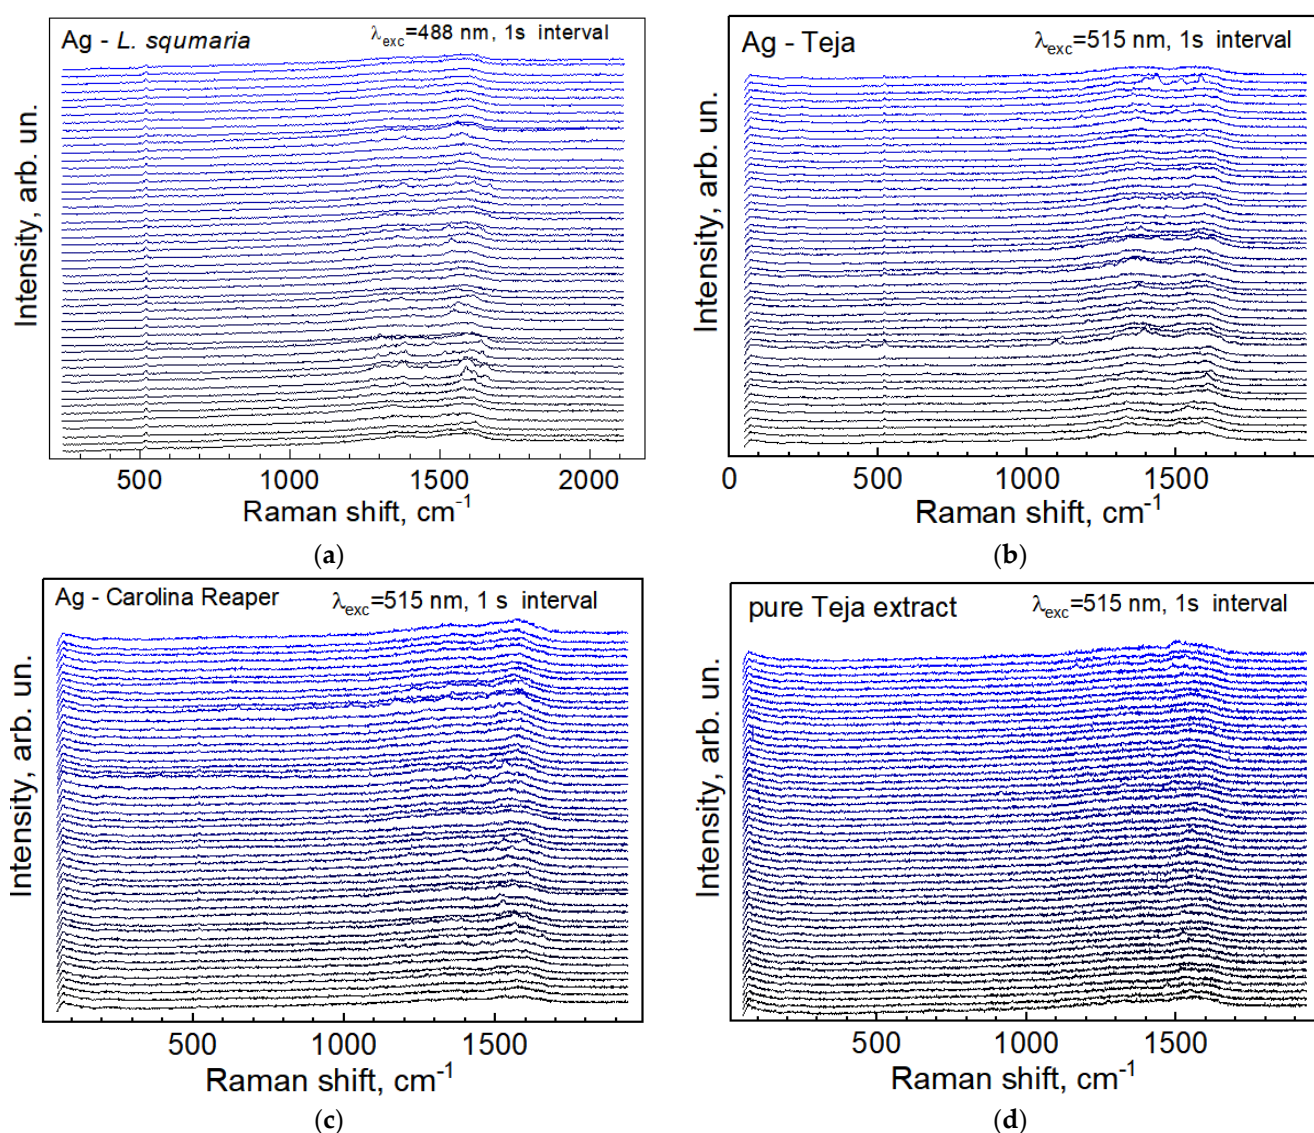

**Figure S3.** Variation of the Raman spectra with time (in 1 s intervals) for Ag-*L. Scuamaria* (a), Ag-Teja (b), Ag-Carolina Reaper (c), and pure Teja extract (d).

**Table S1.** Summary of the IR absorption features of phytosynthesized Ag NPs and their assignment based on the literature data. All numbers in the first column are observed for the pepper extracts, and the underlined ones only for common toothwort.

| This work             | Literature                                           | Assignment                                                                                                                                                                            | main compound, based on Ref [32]                                             |
|-----------------------|------------------------------------------------------|---------------------------------------------------------------------------------------------------------------------------------------------------------------------------------------|------------------------------------------------------------------------------|
| 1028                  | 1030-1045 [30]                                       | C–OH & C–OH stretch: cell wall polysaccharides (arabinan, cellulose) [30]                                                                                                             | 1030, Cellulose                                                              |
| <u>1043</u> ,<br>1050 | 1050 [16]<br>1030-1045 [30]                          | C–O & C–OH stretch: cell wall polysaccharides (arabinan, cellulose) [16,30]                                                                                                           | 1043, Pectins, xyloglucan                                                    |
|                       | 1077 [31,33],1090 [16]                               | C – O stretch of secondary alcohols [31]                                                                                                                                              |                                                                              |
| <u>1076</u> ,<br>1081 | 1060–1065 [30]<br>1070–1075 [30]<br>1075–1085 [30]   | C–O stretch: cell wall polysaccharides (glucomannan) [30]<br>C–O ring stretch: rhamnogalactorunan, $\beta$ -galactan [30]<br>C–O deformation: secondary alcohol, aliphatic ester [30] | 1075, Xyloglucan                                                             |
| <u>1134</u>           | 1105–1110 [30]<br>1100–1105 [30]                     | C–O–C sym stretch: cutin [30]<br>Antisymmetric in-phase: pectic substance[30]                                                                                                         | 1097, Pectins<br>1103-1015, Cellulose                                        |
|                       | 1140–1145 [30]<br>1160–1170 [30]                     | C–O–C asym stretch: cellulose ( $\beta$ -1.4 glucan) [30]<br>C–O–C asym stretch: cutin [30]                                                                                           | 1147, Xyloglucan                                                             |
| 1150                  | 1150–1160 [30,33]                                    | Symmetric bonding of aliphatic CH <sub>2</sub> , OH, or C–O stretch of various groups: cell wall polysaccharide [30]                                                                  | 1160, cellulose                                                              |
|                       | 1235 [30]<br>1230–1235 [30]<br>1200–1205 [30]        | Amide IV (C=N and N–H stretching): mainly protein [30]<br>C–O stretch: lignin, xylan [30]<br>O–H in plane bend: cellulose [30]                                                        |                                                                              |
|                       | 1249 [31]<br>1240–1250 [30]                          | C – N stretch [31]<br>C=O stretch: pectic substances, lignin, hemicellulose, suberin/cutin esters [30]                                                                                | 1230-1368, Pectins                                                           |
| <u>1355</u>           | 1363 [31]<br>1365–1375 [30]                          | N = O of the aliphatic nitro group [31]<br>C–H bend: cellulose and hemicellulose [30]                                                                                                 | 1316-1317, Xyloglucan<br>1320, Cellulose<br>1331, Pectins                    |
|                       | 1395 [31], 1384 [33]<br>1370–1380 [30]               | C – H bending of alkanes (CH <sub>3</sub> ) [31,33]; S=O [16]<br>C–H sym bending of CH <sub>2</sub> and CH <sub>3</sub> : cell wall polysaccharide, lipid and protein [30]            | 1367, Cellulose, hemicelluloses<br>1371, Xyloglucan, cellulose               |
|                       | 1395 [31]<br>1420–1430 [30]                          | C – H bend of alkanes (CH <sub>3</sub> ) [31]<br>O–H bend: cell wall polysaccharide, alcohol, and carboxylic acid [30]                                                                | 1400, Pectin ester group<br>1420, uronic acid<br>1430, Phenol; 1440, Pectins |
| 1517                  | 1505–1515 [30]                                       | C=C aromatic stretch: lignin [30]                                                                                                                                                     | 1515, Phenolic ring                                                          |
| 1542,<br>1547         | 1510 – 1550 [31], 1515 – 1570 [31]<br>1540–1560 [30] | N – H bending in amides & the interaction between N – H bending and C – N stretching of C – N – H group [31]<br>Amide II (C=N and N–H stretch): mainly protein [30]                   | 1550, Amid II (proteins)                                                     |
| 1597,<br><u>1610</u>  | 1590-1620 [16,30,31]                                 | C = C of aromatic group, N – H bending in amides [31]<br>C - C skeletal vibrations/N = H deformations [16]<br>C=O aromatic stretch: lignin, alkaloid [30]                             | 1600, Non esterified uronic acid                                             |
| 1628                  | 1620–1630 [30]                                       | C=C stretch: phenolic compound [30]                                                                                                                                                   | 1630, Phenolic ring, pectin ester group                                      |
| 1658                  | 1630–1650 [30]                                       | Amide I (C=O stretch): protein, pectin, water associated cellulose or lignin, alkaloids [30]                                                                                          | 1650, Amid I (proteins)                                                      |
| <u>1740</u>           | 1730–1745 [30]                                       | Saturated ester C=O stretch: phospholipid, cholesterol ester, hemicellulose, pectin, lignin, suberin/cutin esters [30]                                                                | 1740, Esterified uronic acid, pectins                                        |
|                       | 2874 [31], 2851 [33]                                 | C –H stretch of alkanes [31]                                                                                                                                                          |                                                                              |
| 2854                  | 2840–2860 [30]                                       | CH <sub>2</sub> symmetric stretch: mainly lipids with a little contribution from protein, carbohydrate, and nucleic acid [30]                                                         |                                                                              |
|                       | 2870–2875 [30]                                       | CH <sub>3</sub> symmetric stretch: mainly protein with a little contribution from lipid, carbohydrate, and nucleic acid [30]                                                          |                                                                              |

|             |                                |                                                                                                                                  |
|-------------|--------------------------------|----------------------------------------------------------------------------------------------------------------------------------|
|             | 2939 [31], 2922 [33]           | C –H stretch of alkanes [31]                                                                                                     |
| <u>2926</u> | 2920–2930 [30]                 | CH <sub>2</sub> asymmetric stretch: mainly lipid with a little contribution from protein, carbohydrate, and nucleic acid [30]    |
| <u>2958</u> | 2950–2960 [30]                 | CH <sub>3</sub> asymmetric stretching: mainly lipid with a little contribution from protein, carbohydrate, and nucleic acid [30] |
| 3290        | 3269 [31],<br>3197 & 3267 [34] | hydrogen-bonded OH [31]<br>N-H of protein [34]                                                                                   |
| 3345        | 3354 [34]<br>3200–3500 [30]    | O-H and N-H stretch: carbohydrates, proteins, alcohols and phenolic compounds [30,34]                                            |

## References

1. Malaník, M.; Daňková, I.; Pokorná, M.; Gazdová, M.; Dall'Acqua, S.; Šmejkal, K. Iridoid aglycones from the underground parts of *Lathraea squamaria*. *Biochem. Syst. Ecol.* **2019**, *86*, 103928. <https://doi.org/10.1016/j.bse.2019.103928>.
2. Daňková, I.; Žemlička, M.; Švajdlenka, E.; Bartl, T.; Šmejkal, K. The chemotaxonomic significance of phenylethanoid glycosides of *Lathraea squamaria* L. (Orobanchaceae). *Biochem. Syst. Ecol.* **2016**, *64*, 53–56. <https://doi.org/10.1016/j.bse.2015.11.006>.
3. M. E. Embuscado, *Bioactives from Culinary Spices and Herbs: A Review*, *J. Food Bioact.* **6**, 68 (2019).
4. M. Materska and I. Perucka, *Antioxidant Activity of the Main Phenolic Compounds Isolated from Hot Pepper Fruit (Capsicum Annuum L.)*, *J. Agric. Food Chem.* **53**, 1750 (2005).
